# Supplementary material for: A hybrid fluoride layered perovskite, (enH2)MnF4
Source: Royal Society of Chemistry journal article supplement (doi:10.1039/c9dt00757a), 2019-01-01
Supplement: c9dt00757a2.pdf [file c9dt00757a2.pdf]

## A hybrid fluoride layered perovskite, (enH<sub>2</sub>)MnF<sub>4</sub>

Teng Li<sup>a</sup>, Rebecca Clulow<sup>a</sup>, Alasdair J. Bradford<sup>a,b</sup>, Stephen L. Lee<sup>b</sup>, Alexandra M. Z. Slawin<sup>a</sup> and Philip Lightfoot<sup>\*a</sup>

a. School of Chemistry and EaStChem, University of St Andrews, St Andrews, Fife, KY16 9ST, UK.  
e-mail: [pl@st-andrews.ac.uk](mailto:pl@st-andrews.ac.uk)

b. School of Physics, University of St Andrews, St Andrews, Fife, KY16 9SS, UK

### Supplementary Information

**Table S3.** ISODISTORT mode decomposition for (enH<sub>2</sub>)MnF<sub>4</sub> at 93 K.

## ISODISTORT: modes details

### Parent structure (123 P4/mmm)

a=4.23500, b=4.23500, c=8.16000, alpha=90.00000, beta=90.00000, gamma=90.00000

| atom | site | x       | y       | z       | occ     |
|------|------|---------|---------|---------|---------|
| Mn1  | 1a   | 0.00000 | 0.00000 | 0.00000 | 1.00000 |
| F1   | 2f   | 0.00000 | 0.50000 | 0.00000 | 1.00000 |
| F2   | 2g   | 0.00000 | 0.00000 | 0.25700 | 1.00000 |

### Subgroup details

14 P2<sub>1</sub>/c, basis={(0,0,1), (1,1,0), (-1,1,0)}, origin=(0,0,1/2), s=2, i=8

### Undistorted superstructure

a=8.16000, b=5.98919, c=5.98919, alpha=90.00000, beta=90.00000, gamma=90.00000

| atom | site | x       | y       | z       | occ     | displ   |
|------|------|---------|---------|---------|---------|---------|
| Mn1  | 2b   | 0.50000 | 0.50000 | 0.50000 | 1.00000 | 0.00000 |
| F1   | 4e   | 0.50000 | 0.75000 | 0.75000 | 1.00000 | 0.00000 |
| F2   | 4e   | 0.75700 | 0.50000 | 0.50000 | 1.00000 | 0.00000 |

### Distorted superstructure

a=8.17349, b=5.98682, c=5.96372, alpha=90.00000, beta=90.28722, gamma=90.00000

| atom | site | x       | y       | z       | occ     | displ   |
|------|------|---------|---------|---------|---------|---------|
| Mn1  | 2b   | 0.50000 | 0.50000 | 0.50000 | 1.00000 | 0.00000 |
| F1   | 4e   | 0.52763 | 0.78515 | 0.71488 | 1.00000 | 0.37367 |
| F2   | 4e   | 0.75458 | 0.45781 | 0.53033 | 1.00000 | 0.31136 |

### Displacive mode definitions

| atom                                 | x       | y       | z       | dx         | dy     | dz      |
|--------------------------------------|---------|---------|---------|------------|--------|---------|
| P4/mmm[0,0,0]GM1+(a) [F2:g:dsp]A1(a) |         |         |         | normfactor | =      | 0.06127 |
| F2                                   | 0.75700 | 0.50000 | 0.50000 | 1.0000     | 0.0000 | 0.0000  |

P4/mmm[0,0,0]GM5+(a,a) [F2:g:dsp]E(a) normfactor = 0.08348

F2 0.75700 0.50000 0.50000 0.0000 0.0000 -1.0000

P4/mmm[1/2,1/2,0]M2+(a) [F1:f:dsp]B2u(a) normfactor = 0.05903

F1 0.50000 0.75000 0.75000 0.0000 -1.0000 -1.0000

P4/mmm[1/2,1/2,0]M3+(a) [F1:f:dsp]B3u(a) normfactor = 0.05903

F1 0.50000 0.75000 0.75000 0.0000 -1.0000 1.0000

P4/mmm[1/2,1/2,0]M5+(0,a) [F1:f:dsp]B1u(a) normfactor = 0.06127

F1 0.50000 0.75000 0.75000 1.0000 0.0000 0.0000

P4/mmm[1/2,1/2,0]M5+(0,a) [F2:g:dsp]E(a) normfactor = 0.08348

F2 0.75700 0.50000 0.50000 0.0000 -1.0000 0.0000

### Displacive mode amplitudes

| mode                           | As       | Ap       | dmax    |
|--------------------------------|----------|----------|---------|
| [0,0,0]GM1+[F2:g:dsp]A1(a)     | -0.03949 | -0.02792 | 0.01975 |
| [0,0,0]GM1+ all                | 0.03949  | 0.02792  |         |
| [0,0,0]GM5+[F2:g:dsp]E(a)      | -0.36330 | -0.25689 | 0.18165 |
| [0,0,0]GM5+ all                | 0.36330  | 0.25689  |         |
| [1/2,1/2,0]M2+[F1:f:dsp]B2u(a) | -0.00025 | -0.00018 | 0.00013 |
| [1/2,1/2,0]M2+ all             | 0.00025  | 0.00018  |         |
| [1/2,1/2,0]M3+[F1:f:dsp]B3u(a) | -0.59519 | -0.42086 | 0.29760 |
| [1/2,1/2,0]M3+ all             | 0.59519  | 0.42086  |         |
| [1/2,1/2,0]M5+[F1:f:dsp]B1u(a) | 0.45092  | 0.31885  | 0.22546 |
| [1/2,1/2,0]M5+[F2:g:dsp]E(a)   | 0.50537  | 0.35735  | 0.25269 |
| [1/2,1/2,0]M5+ all             | 0.67729  | 0.47892  |         |
| Overall                        | 0.97290  | 0.68794  |         |

### Parent-cell strain mode definitions

|                                                      | e1     | e2     | e3     | e4     | e5      | e6     |
|------------------------------------------------------|--------|--------|--------|--------|---------|--------|
| P4/mmm[0,0,0]GM1+(a)strain_1(a) normfactor = 0.70711 | 1.0000 | 1.0000 | 0.0000 | 0.0000 | 0.0000  | 0.0000 |
| P4/mmm[0,0,0]GM1+(a)strain_2(a) normfactor = 1.00000 | 0.0000 | 0.0000 | 1.0000 | 0.0000 | 0.0000  | 0.0000 |
| P4/mmm[0,0,0]GM4+(a)strain(a) normfactor = 1.41421   | 0.0000 | 0.0000 | 0.0000 | 0.0000 | 0.0000  | 1.0000 |
| P4/mmm[0,0,0]GM5+(a,a)strain(a) normfactor = 1.00000 | 0.0000 | 0.0000 | 0.0000 | 1.0000 | -1.0000 | 0.0000 |

### Parent-cell strain mode amplitudes

| mode                   | amplitude |
|------------------------|-----------|
| [0,0,0]GM1+strain_1(a) | -0.00329  |
| [0,0,0]GM1+strain_2(a) | 0.00165   |
| [0,0,0]GM4+strain(a)   | 0.00273   |
| [0,0,0]GM5+strain(a)   | -0.00354  |

**Table S4.** ISODISTORT derivatives of TlAlF<sub>4</sub> aristotype (*P4/mmm*), based on all combinations of M<sub>3</sub><sup>+</sup>, M<sub>5</sub><sup>+</sup> and X<sub>3</sub><sup>+</sup> tilt modes.

**M3+ only**

P1 (a) 127 *P4/mbm*, basis={ (1,1,0), (-1,1,0), (0,0,1) }, origin=(0,0,0), s=2, i=2, k-active= (1/2,1/2,0)

**M5+ only**

P1 (a,0) 53 *Pmna*, basis={ (1,1,0), (0,0,1), (1,-1,0) }, origin=(0,0,0), s=2, i=4, k-active= (1/2,1/2,0)

P3 (a,a) 67 *Cmma*, basis={ (2,0,0), (0,2,0), (0,0,1) }, origin=(1/2,1/2,0), s=2, i=4, k-active= (1/2,1/2,0)

C1 (a,b) 13 *P2/c*, basis={ (-1,1,0), (0,0,1), (2,0,0) }, origin=(0,0,0), s=2, i=8, k-active= (1/2,1/2,0)

**X3+ only**

P1 (a;-a) 129 *P4/nmm*, basis={ (2,0,0), (0,2,0), (0,0,1) }, origin=(1,0,0), s=4, i=4, k-active= (0,1/2,0), (1/2,0,0)

P3 (0;a) 51 *Pmma*, basis={ (2,0,0), (0,1,0), (0,0,1) }, origin=(0,0,0), s=2, i=4, k-active= (1/2,0,0)

C1 (a;b) 59 *Pmmn*, basis={ (2,0,0), (0,2,0), (0,0,1) }, origin=(0,0,0), s=4, i=8, k-active= (0,1/2,0), (1/2,0,0)

**M3+ and M5+**

P1(1)P3(1) (a|b,b) 12 *C2/m*, basis={ (0,-2,0), (2,0,0), (0,0,1) }, origin=(1/2,-1/2,0), s=2, i=8, k-active= (1/2,1/2,0); (1/2,1/2,0)

P1(1)P1(1) (a|b,0) 14 *P2\_1/c*, basis={ (0,0,1), (1,-1,0), (1,1,0) }, origin=(0,0,0), s=2, i=8, k-active= (1/2,1/2,0); (1/2,1/2,0)

P1(1)C1(1) (a|b,c) 2 *P-1*, basis={ (1,1,0), (-1,1,0), (0,0,1) }, origin=(0,0,0), s=2, i=16, k-active= (1/2,1/2,0); (1/2,1/2,0)

**M3+ and X3+**

P1(1)C1(1) (a|b;c) 59 *Pmmn*, basis={ (2,0,0), (0,2,0), (0,0,1) }, origin=(0,0,0), s=4, i=8, k-active= (1/2,1/2,0); (0,1/2,0), (1/2,0,0)

**M5+ and X3+**

P3(1)P3(1) (a,a|0;b) 51 *Pmma*, basis={ (2,0,0), (0,2,0), (0,0,1) }, origin=(0,0,0), s=4, i=8, k-active= (1/2,1/2,0); (1/2,0,0)

P3(1)P3(2) (a,a|b;0) 57 *Pbcm*, basis={ (0,0,1), (0,2,0), (-2,0,0) }, origin=(0,0,0), s=4, i=8, k-active= (1/2,1/2,0); (0,1/2,0)

C1(1)P3(1) (a,b|0;c) 13 *P2/c*, basis={ (0,2,0), (0,0,1), (2,0,0) }, origin=(0,0,0), s=4, i=16, k-active= (1/2,1/2,0); (1/2,0,0)

■ P1(1)P1(1) (a,0|b;-b) 12 C2/m, basis={{(2,-2,0),(2,2,0),(0,0,1)}, origin=(0,0,0), s=4, i=16, k-active=(1/2,1/2,0);(0,1/2,0),(1/2,0,0)

■ P3(1)C1(1) (a,a|b;c) 11 P2\_1/m, basis={{(0,0,-1),(-2,0,0),(0,2,0)}, origin=(0,0,0), s=4, i=16, k-active=(1/2,1/2,0);(0,1/2,0),(1/2,0,0)

■ C1(1)C1(1) (a,b|c;d) 2 P-1, basis={{(0,0,1),(0,2,0),(-2,0,0)}, origin=(0,0,0), s=4, i=32, k-active=(1/2,1/2,0);(0,1/2,0),(1/2,0,0)
